# Supplementary material for: Engineering a gold nanoparticles-carbon dots nanocomposite with pH-flexibility for monitoring hydrogen peroxide released from living cells
Source: Royal Society of Chemistry journal article supplement (doi:10.1039/d3an00936j), 2023-01-01
Supplement: d3an00936j1.pdf [file d3an00936j1.pdf]

## Supporting information

### Engineering Gold Nanoparticles-Carbon Dots Nanocomposite with pH-Flexibility for Monitoring Hydrogen Peroxide Released from Living Cells

Hongmei Xu\*, Lili Guo, Weijiang Duan, Yang Liu, Shaomin Shuang and Chuan Dong\*

Institute of Environmental Science, and School of Chemistry and Chemical  
Engineering, Shanxi University, Taiyuan 030006, P. R. China

**\*Corresponding author**

[E-mail: xhm@sxu.edu.cn](mailto:xhm@sxu.edu.cn); [dc@sxu.edu.cn](mailto:dc@sxu.edu.cn)

## **Materials and Reagents**

The horseradish peroxidase (HRP),  $\beta$ -cyclodextrin ( $\beta$ -CDs), 3,3',5,5'-tetramethylbenzidine (TMB), 2,2'-azino-bis(3-ethylbenzothiazoline-6-sulfonic acid) (ABTS), o-phenylenediamine (OPD), sodium hydroxide, phosphate buffer saline (PBS), and phorbol 12-myristate 13-acetate (PMA) were all purchased from Aladdin. The  $H_2O_2$  solution, manganese chloride, ethylene diamine tetraacetic acid (EDTA) and terephthalic acid (PTA) were supplied by Sinopharm Chemical Reagent Co., Ltd. The singlet oxygen sensor green reagents (SOSG) were obtained from Sigma Aldrich. All other reagents were in the analytical grade, and all solutions were prepared with ultrapure deionized water ( $18.2\text{ M}\Omega\cdot\text{cm}$ , Millipore).

## **Preparation of CDs**

The CDs were prepared by a facile one-step hydrothermal method. In detail, 0.3 g of  $\beta$ -cyclodextrin was dissolved in 15 mL of aqueous solution, which was transferred to a 50 mL Teflon-lined autoclave for heating at  $160\text{ }^\circ\text{C}$  for 4 h. The obtained CDs were dialyzed with a dialysis membrane (MWCO~1000) for 24 h and then collected by freeze-drying. The concentration of CDs was fixed at 0.4 mg/mL, which was the same as the amount of AuNPs and Au-CDs nanocomposite in colorimetric assay.

### Characterization of AuNPs and Au-CDs nanocomposite

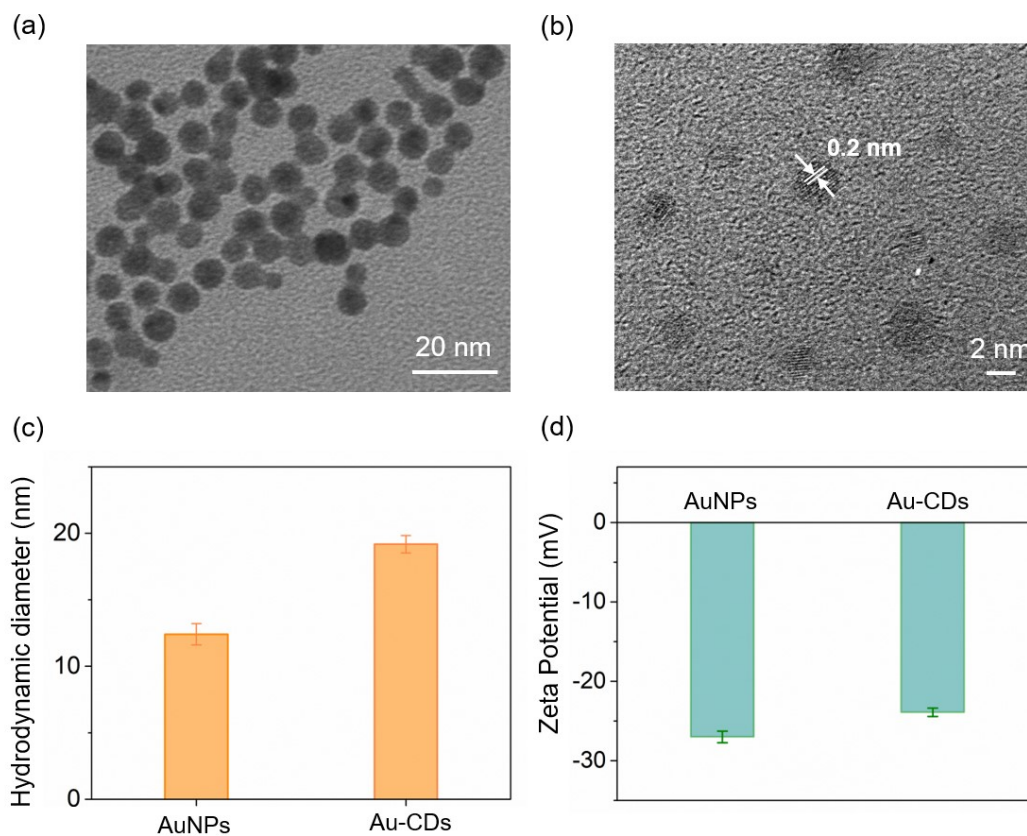

**Figure S1** (a, b) TEM image of AuNPs (a) and CDs (b). (c, d) Variation of hydrodynamic size distribution (c) and zeta potential (d) in the construction of Au-CDs nanocomposite.

## Elemental mapping images of Au-CDs nanocomposite

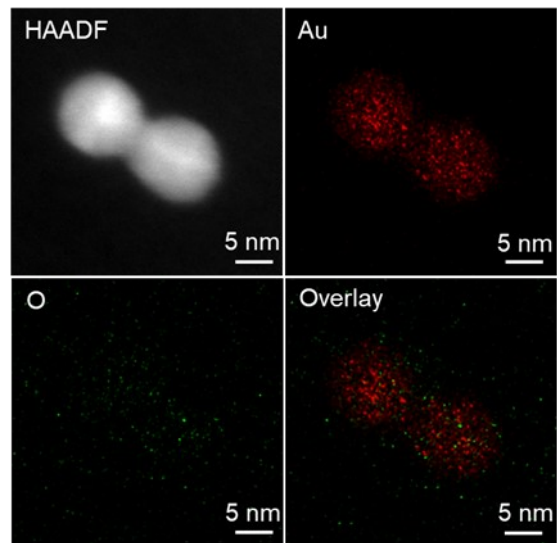

**Figure S2** HAADF-STEM, Au, O, and overlay elemental mapping images of Au-CDs nanocomposite.

## XPS spectra of AuNPs

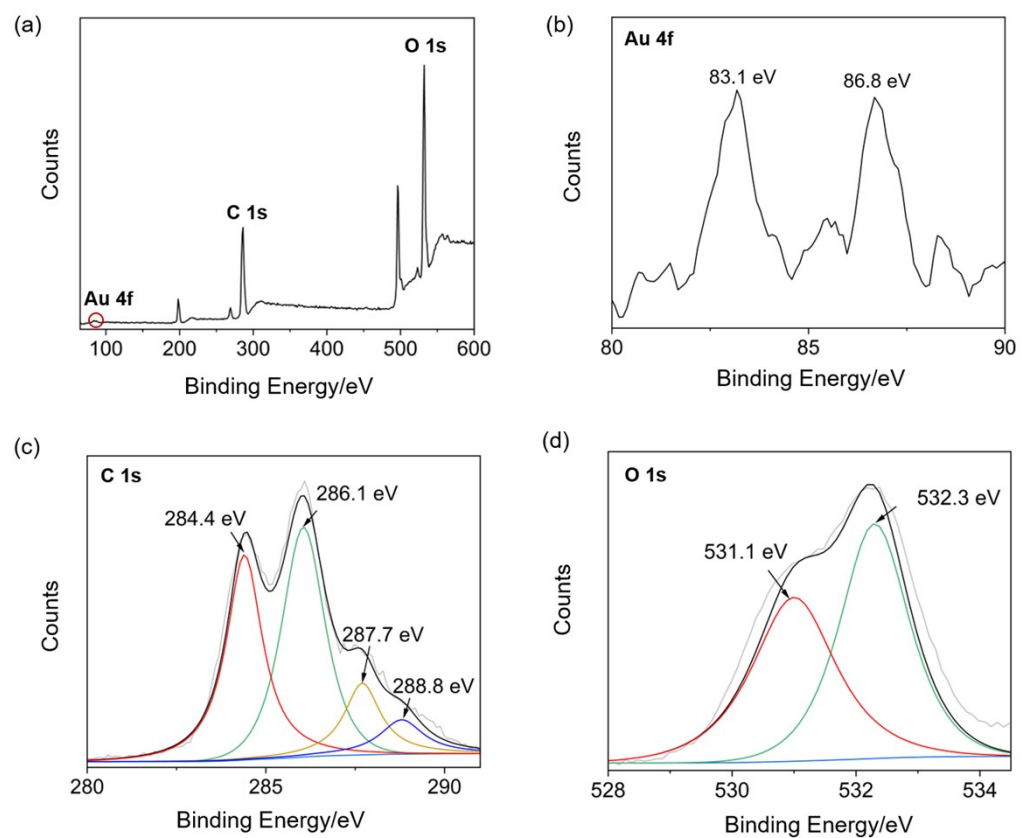

**Figure S3** XPS survey spectrum of AuNPs (a) and high-resolution XPS spectra of Au 4f (b), C 1s (c) and O 1s (d).

## XPS spectra of CDs

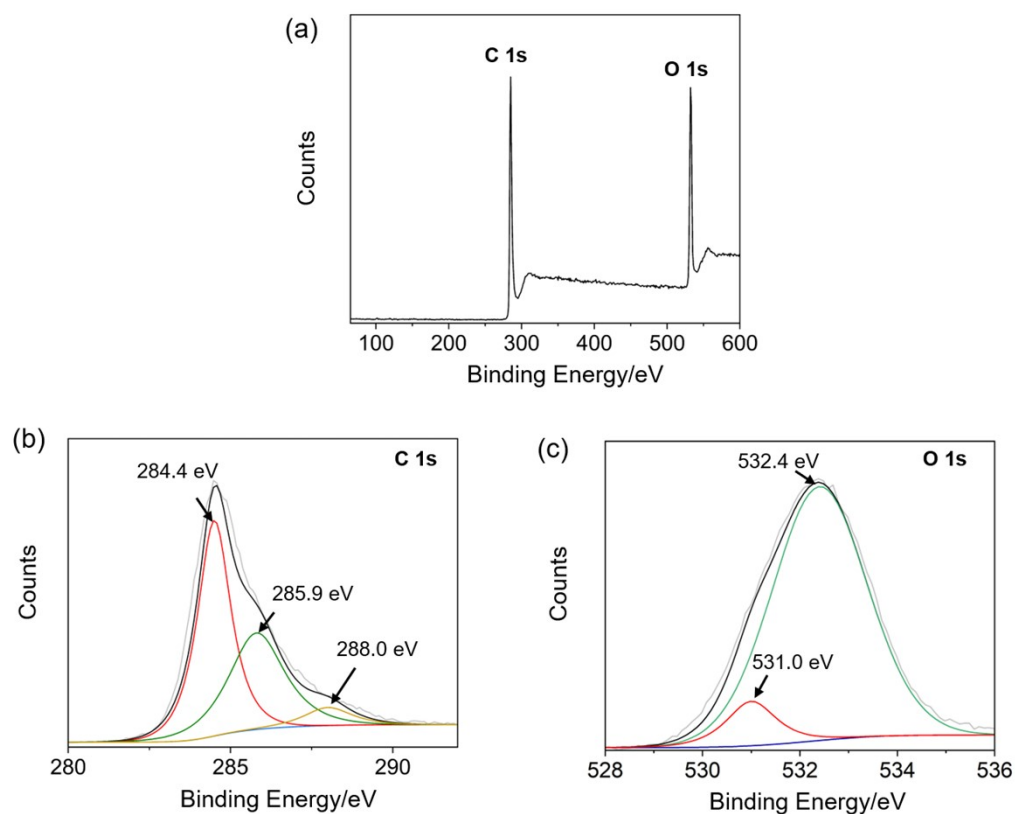

**Figure S4** XPS survey spectrum of carbon dots (a) and high-resolution XPS spectra of C 1s (b) and O 1s (c).

**Optimization of reaction parameters in the construction of Au-CDs nanocomposite**

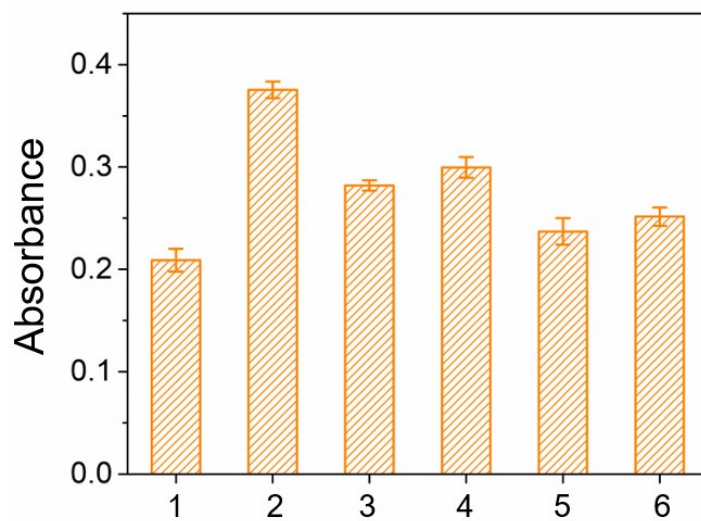

**Figure S5** The absorbance of oxTMB at 652 nm varied with different reaction parameters in the construction of Au-CDs nanocomposite. The reaction conditions were as follows: 1: calcination at 160°C for 2 h; 2: calcination at 160°C for 4 h; 3: calcination at 160°C for 6 h; 4: calcination at 180°C for 2 h; 5: calcination at 180°C for 4 h; 6: calcination at 180°C for 6 h.

## Optimization of reaction parameters in the Au-CDs nanocomposite mediated colorimetric assay

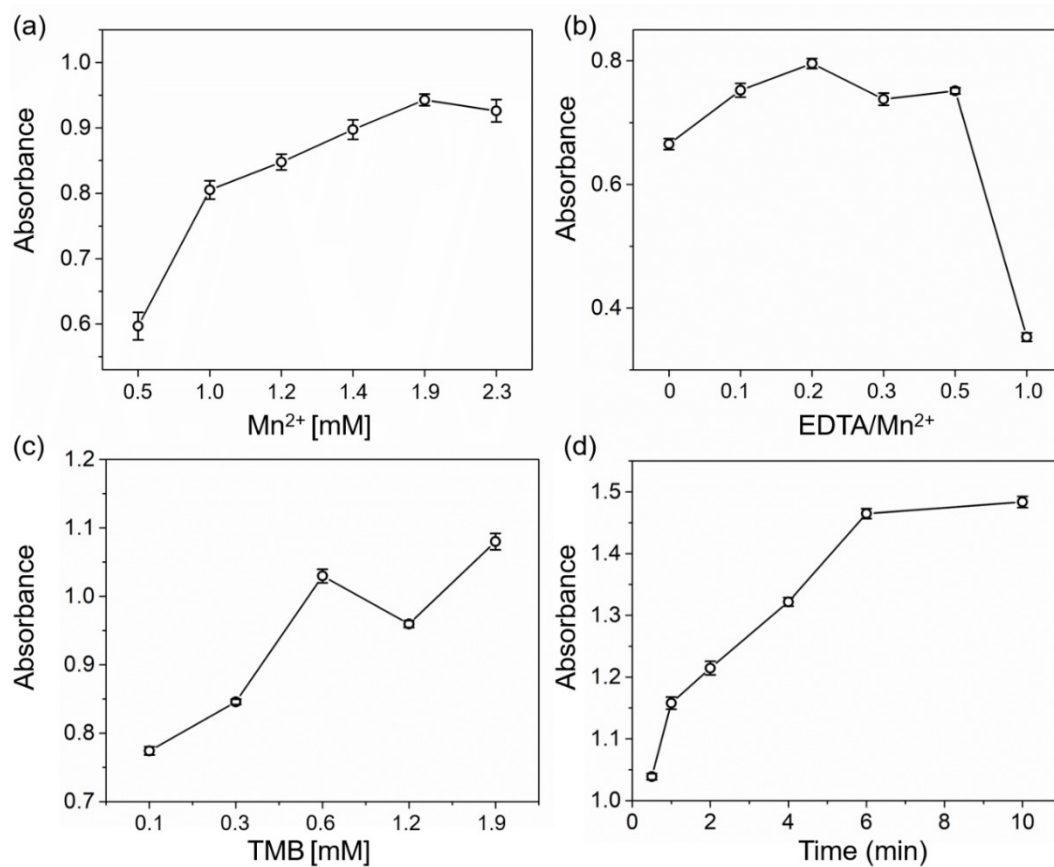

**Figure S6** The absorbance of oxTMB at 652 nm varied with the concentrations of  $Mn^{2+}$  ions (a), different concentration ratios of EDTA to  $Mn^{2+}$  ions (b), the concentrations of TMB substrate (c) and the light illumination time (d).



### Photo-oxidation performance of Au-CDs nanocomposite

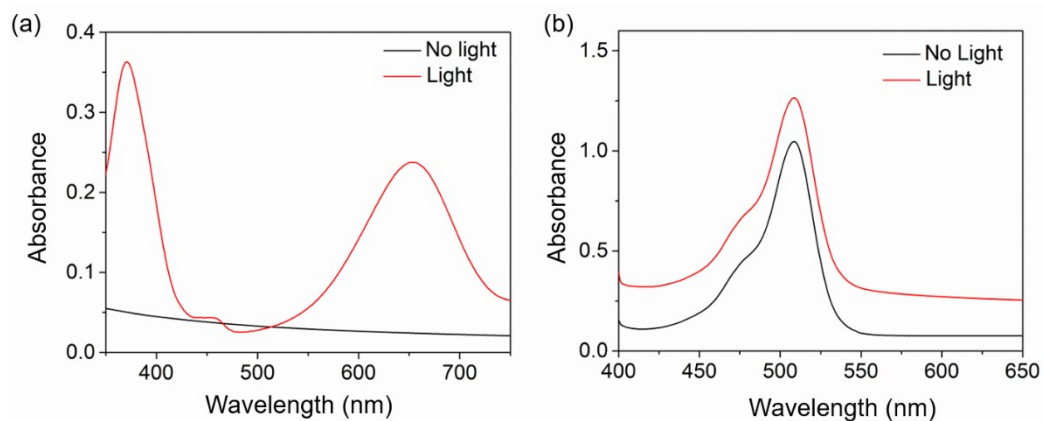

**Figure S7** (a) The UV-vis spectra of TMB oxidized by Au-CDs nanocomposite with and without light irradiation in PBS buffer (10 mM, pH=7.4). (b) UV-vis spectra of SOSG incubated with Au-CDs nanocomposite with and without light irradiation in PBS buffer (10 mM, pH=7.4).

### Verification of the hydroxyl radical during light irradiation

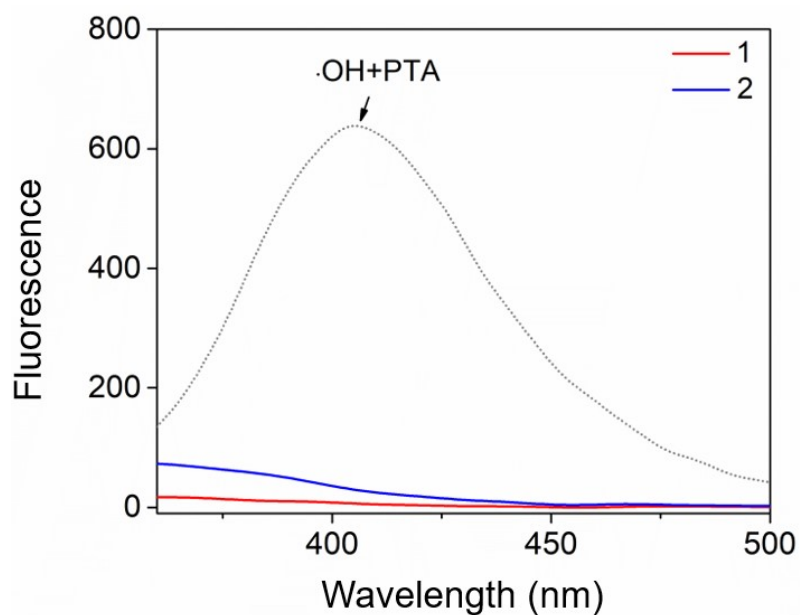

**Figure S8** The fluorescent spectra of 2-hydroxy terephthalic acid (HTA) in the reaction buffer (10 mM PBS, pH=7.4) containing Au-CDs nanocomposite without (line 1) or with (line 2) light irradiation. In theory, the  $\cdot\text{OH}$  in the solution can react with PTA to generate 2-hydroxy terephthalic acid (HTA) emitting blue fluorescence (dot line) under excitation by 315 nm light.

## The specificity of $Mn^{2+}$ and EDTA ligand for improvement of catalytic performance

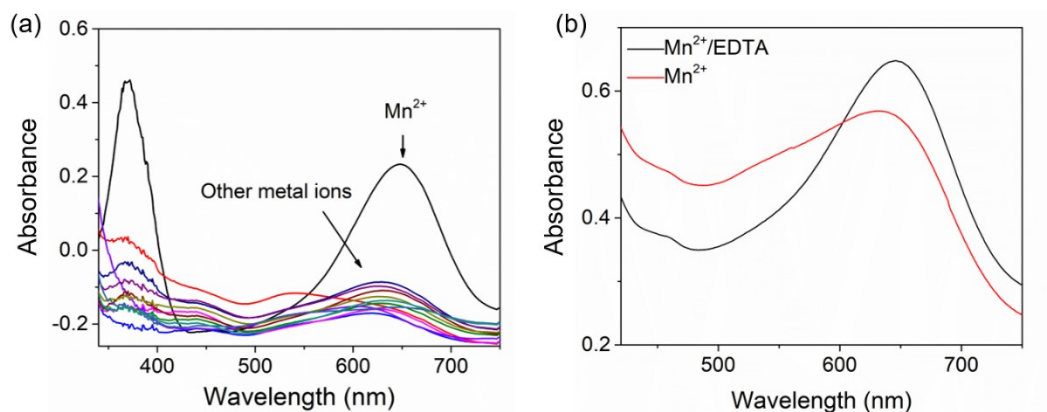

**Figure S9** (a) The UV-vis spectra of TMB substrate oxidized by Au-CDs nanocomposite in the presence of various metal ions and EDTA ligands. The concentrations of metal ions including  $Mn^{2+}$ ,  $Cr^{3+}$ ,  $Co^{2+}$ ,  $Ca^{2+}$ ,  $Ba^{2+}$ ,  $Zn^{2+}$ ,  $Fe^{3+}$ ,  $Mg^{2+}$ ,  $Cd^{2+}$ ,  $Ni^{2+}$ ,  $Hg^{2+}$  and  $Cu^{2+}$  were 1.9 mM. (b) The UV-vis spectra of TMB substrate oxidized by Au-CDs nanocomposite with and without addition of EDTA ligands in the presence of  $Mn^{2+}$ .

### Photo-oxidation capability of different nanozymes

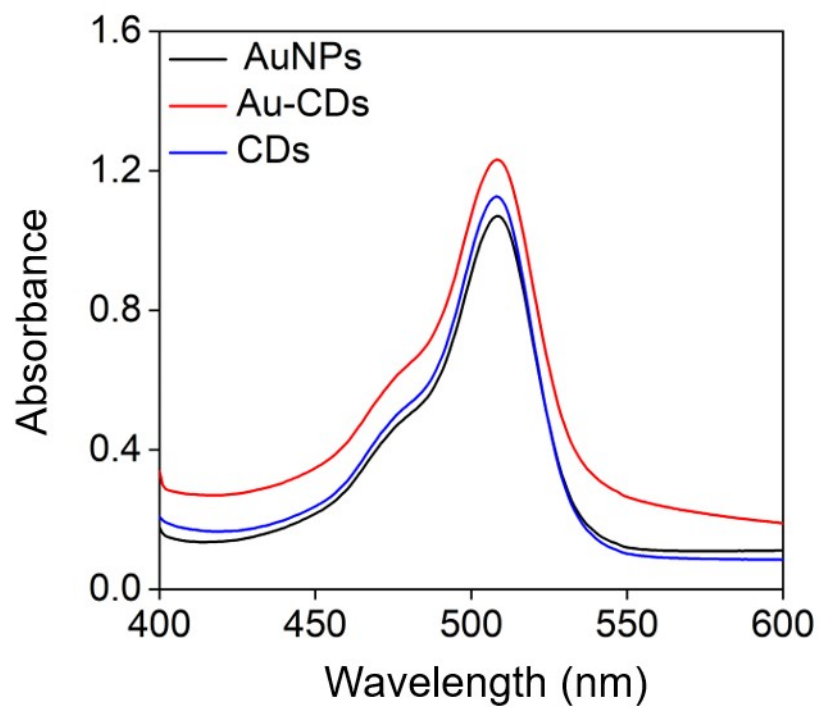

**Figure S10** UV-vis absorption spectra of SOSG incubated with different nanoprobe under light irradiation.

### Kinetics assay of Au-CDs nanocomposite

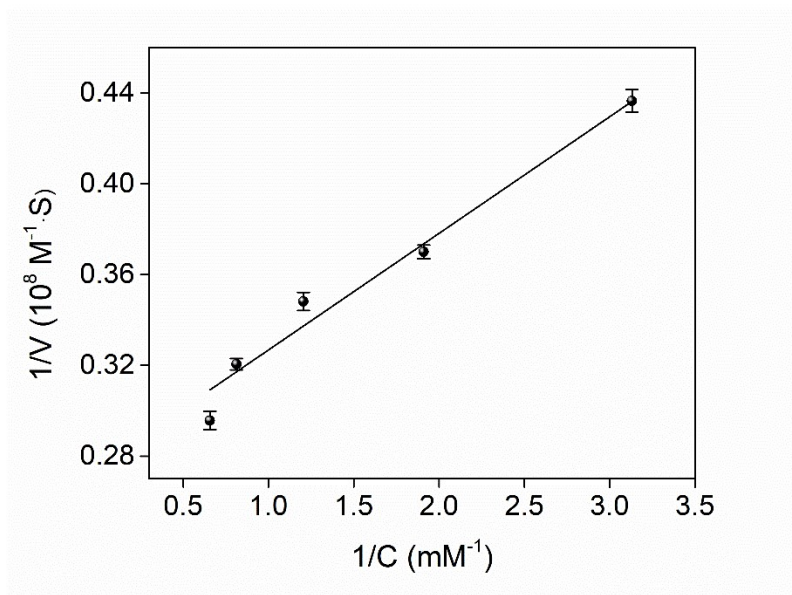

**Figure S11** The double-reciprocal plots of the initial reaction velocity and the concentrations of TMB substrate in PBS buffer (10 mM, pH 7.4). The relative low  $K_m$  values (0.188 mM) of Au-CDs nanocomposite demonstrated the strong binding affinity compared to HRP.

### Calculation of Limit of Detection (LOD)

The LOD was calculated according to the literature.

According to the calibration curve:

$$Y = a + bX \quad (1)$$

When  $b > 0$ ,

$$LOD = 10 \frac{(y_0 + 3SD) - a}{b} \quad (2)$$

When  $b < 0$ ,

$$LOD = 10 \frac{(y_0 - 3SD) - a}{b} \quad (3)$$

where  $SD$  and  $y_0$  are the standard deviation and relative absorbance of the blank control, respectively.

The linear regression equation was expressed as:

$$Y = 0.059 + 0.521X \quad (4)$$

Since  $y_0$  and  $SD$  of blank sample are 0 and 0.002 respectively, the LOD is calculated to be 1.86 nM.

**The UV-vis absorption spectrum of MnO<sub>2</sub>**

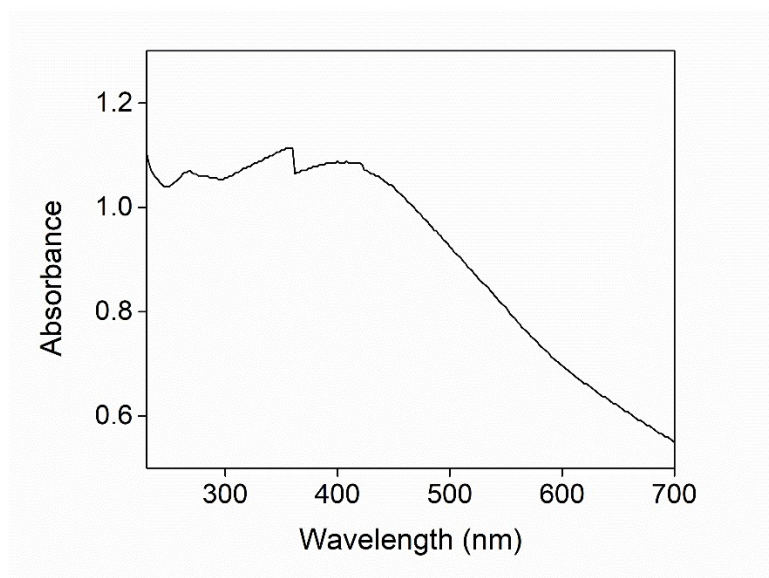

**Figure S12** The UV-vis absorption spectrum of MnO<sub>2</sub> nanoparticles.

### Fluorescent assay for the verification of hydroxyl radical with addition of H<sub>2</sub>O<sub>2</sub>

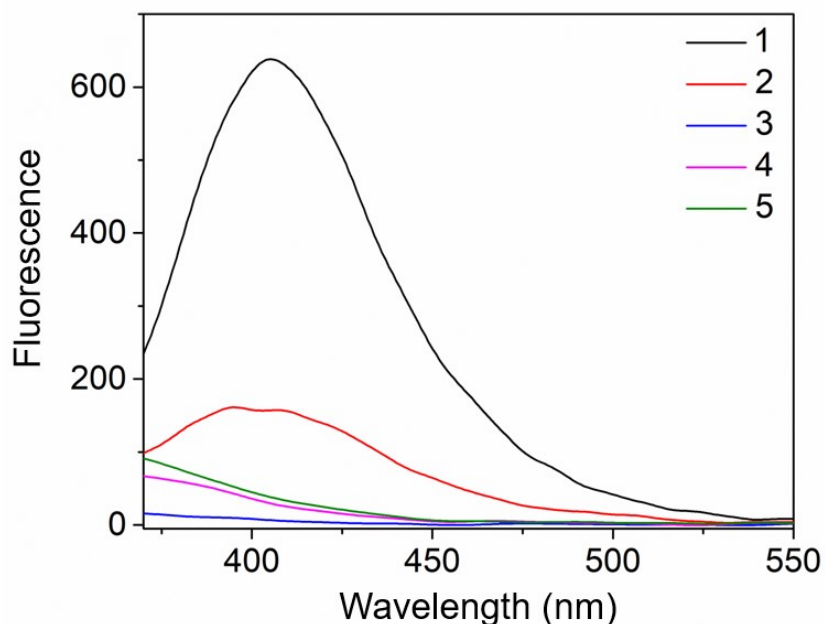

**Figure S13** The fluorescence spectrum of terephthalic acid incubated with different reaction solution. 1: 10 mM PBS (pH=4.5) buffer containing Mn<sup>2+</sup> ions, EDTA, H<sub>2</sub>O<sub>2</sub> under light irradiation. 2: 10 mM PBS (pH=4.5) buffer containing Mn<sup>2+</sup> ions and EDTA under light irradiation. 3: 10 mM PBS (pH=7.4) buffer containing Au-CDs nanocomposite under light irradiation. 4: 10 mM PBS (pH=7.4) buffer containing Au-CDs nanocomposite, Mn<sup>2+</sup> ions and EDTA under light irradiation. 5: 10 mM PBS (pH=7.4) buffer containing Au-CDs nanocomposite, Mn<sup>2+</sup> ions, EDTA and H<sub>2</sub>O<sub>2</sub> under light irradiation.



### Cytotoxicity of the Au-CDs nanocomposite

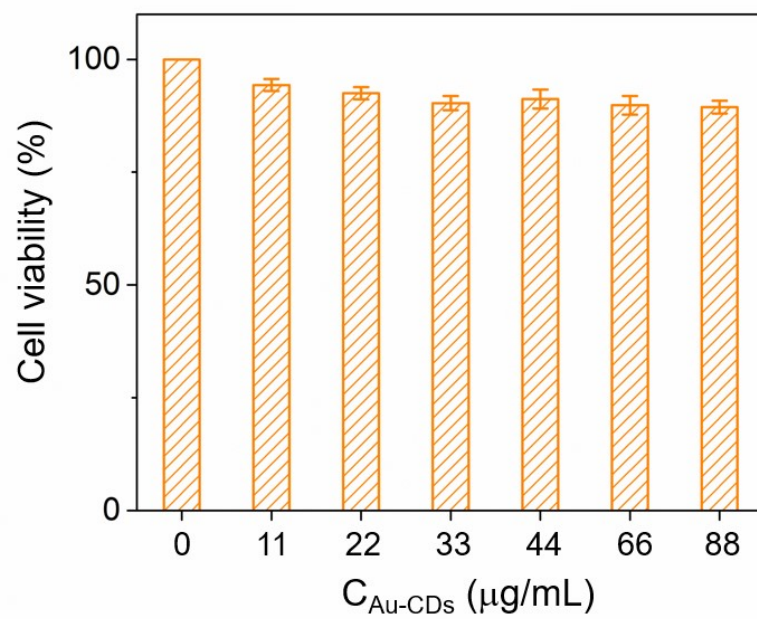

**Figure S14** Cell viability of SW480 cells incubated with different concentrations of Au-CDs nanocomposite for 12 h.

Table S1 Comparison of the kinetic parameters of Au-CDs nanocomposite with HRP and other nanozymes in catalyzing TMB substrate

| <b>Catalyst</b>                | <b><math>V_{\max}</math> (<math>10^{-8}</math> M s<math>^{-1}</math>)</b> | <b><math>K_m</math> (mM)</b> | <b>Optimal pH</b> | <b>Ref.</b> |
|--------------------------------|---------------------------------------------------------------------------|------------------------------|-------------------|-------------|
| HRP                            | 10.0                                                                      | 0.434                        | acid              | 17          |
| AuNPs                          | 12.15                                                                     | 0.74                         | acid              | S1          |
| Fe <sub>3</sub> O <sub>4</sub> | 17.66                                                                     | 0.233                        | acid              | 17          |
| Au-PtNCs                       | 13.67                                                                     | 0.362                        | acid              | S2          |
| Au-CDs                         | 3.51                                                                      | 0.188                        | neutral           | This work   |

Table S2 Comparison of the performance of Au-CDs based colorimetric assay with previous methods for assaying H<sub>2</sub>O<sub>2</sub>

| <b>Material</b>        | <b>Analytical technique</b> | <b>Detection range</b> | <b>LOD</b> | <b>Ref.</b> |
|------------------------|-----------------------------|------------------------|------------|-------------|
| AuCuNWs                | Electrochemical             | 3-360 nM               | 2 nM       | S3          |
| AuNCs-MnO <sub>2</sub> | Fluorometric                | 0.06-2 μM              | 53 nM      | 4           |
| ZIF-8                  | SERS                        | 1 nM-1 mM              | 0.357 nM   | 10          |
| CPP nanoflare          | Colorimetric                | 5 μM-5 mM              | 1.2 μM     | 12          |
| Au@MnO <sub>2</sub>    | Colorimetric                | 60-200 μM              | 6.54 μM    | 13          |
| Au-CDs                 | Colorimetric                | 2.3 nM-0.94 mM         | 1.86 nM    | This work   |

## References

- 1 X. Chen, X. Tian, B. Su, Z. Huang, X. Chen and M. Oyama, *Dalton Trans.*, 2014, **43**, 7449-7454.
- 2 J. Feng, P. Huang and F.-Y. Wu, *Analyst*, 2017, **142**, 4106-4115.
- 3 N. Wang, Y. Han, Y. Xu, C. Gao and X. Cao, *Anal. Chem.*, 2015, **87**, 457-463.
